# Supplementary material
Source: publisher figshare collection journal article supplement (https://aacr.figshare.com/articles/dataset/_/22632997)
Supplement: Supplementary file 1 [file 40161349]

# Supplemental Fig. 4.

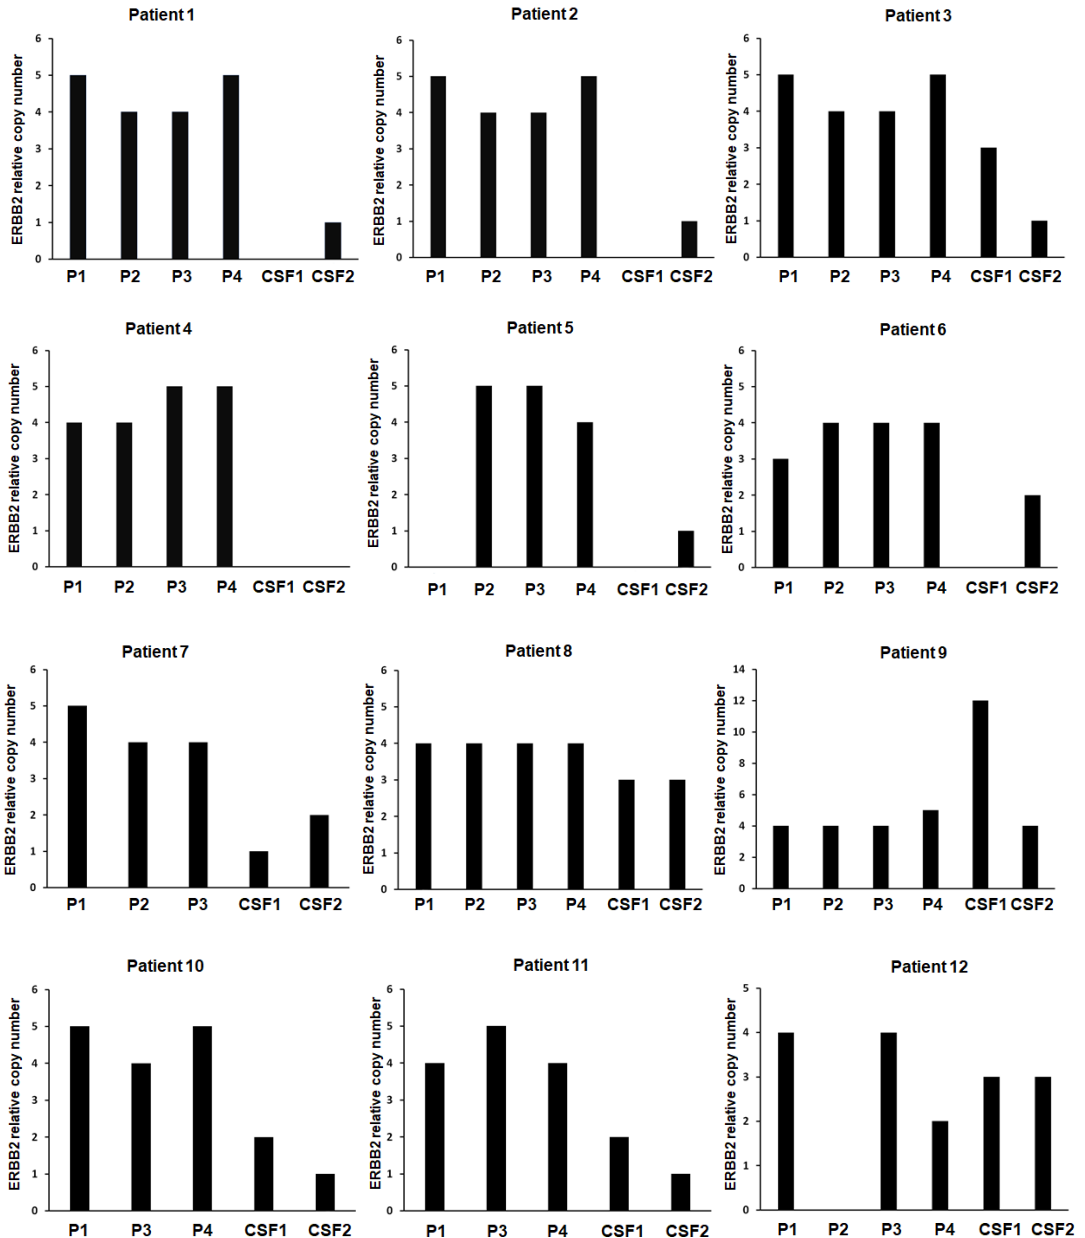

**Supplemental Fig. 4. Histogram illustrating *ERBB2* relative copy number in plasma and CSF cfDNA samples from 12 patients during their T-DM1/TMZ combination therapy.** The patient number is indicated above the panel and corresponds to Fig. 1. The *ERBB2* relative copy number (>2.0) was considered amplified. No analysis of normal patient tissue was performed.
